# Supplementary material
Source: PubMed Central journal article supplement (PMC6429671)
Supplement: 808676_Supplementary_Table.pdf [file 808676_Supplementary_Table.pdf]

**Supplemental Table e-1 – Frequency of Visits and Scans for each Unique Patient**

| <b>No. Visits</b> | <b>276 Unique Pts</b> | <b>No. Scans</b> | <b>276 Unique Pts</b> |
|-------------------|-----------------------|------------------|-----------------------|
| 1                 | 215                   | 1                | 110                   |
| 2                 | 42                    | 2                | 12                    |
| 3                 | 6                     | 3                | 3                     |
| 4                 | 6                     | 11               | 1                     |
| 5                 | 5                     |                  |                       |
| 7                 | 1                     |                  |                       |
| 23                | 1                     |                  |                       |
